# Supplementary material
Source: PubMed Central journal article supplement (PMC6875873)
Supplement: jp9b07916_si_001.pdf [file jp9b07916_si_001.pdf]

**Supporting Information:**

**Dielectric Decrement for Aqueous NaCl**

**Solutions: The Effect of Ionic Charge Scaling in**

**Non-Polarizable Water Force Fields**

Sayan Seal,<sup>†,‡</sup> Katharina Doblhoff-Dier,<sup>†,‡</sup> and Jörg Meyer<sup>\*,†</sup>

*†Gorlaeus Laboratories, Leiden Institute of Chemistry, Leiden University, P.O. Box 9502,  
2300 RA Leiden, The Netherlands*

*‡Contributed equally to this work*

E-mail: [j.meyer@chem.leidenuniv.nl](mailto:j.meyer@chem.leidenuniv.nl)

Phone: +31 (0)71 527 5569

# 1 Force Field Parameters

**Table S1:** Well depth parameters of Lennard-Jones potentials ( $\gamma$  in kJ/mol) used for various interaction pairs in the different force fields.

| $\gamma$ (kJ/mol) |        | O      | H   | Na <sup>+</sup> | Cl <sup>-</sup> |
|-------------------|--------|--------|-----|-----------------|-----------------|
| O                 | CC     | 0.6502 | 0.0 | 0.5215          | 0.5215          |
|                   | BPCEAV | 0.7749 | 0.0 | 0.7933          | 0.0619          |
|                   | MP     | 0.7749 | 0.0 | 0.5036          | 0.2848          |
|                   | MPS    | 0.7749 | 0.0 | 0.5036          | 0.2848          |
| H                 | CC     | 0.0    | 0.0 | 0.0             | 0.0             |
|                   | BPCEAV | 0.0    | 0.0 | 0.0             | 0.0             |
|                   | MP     | 0.0    | 0.0 | 0.0             | 0.0             |
|                   | MPS    | 0.0    | 0.0 | 0.0             | 0.0             |
| Na <sup>+</sup>   | CC     | 0.5215 | 0.0 | 0.4184          | 0.4184          |
|                   | BPCEAV | 0.7933 | 0.0 | 1.4723          | 1.4388          |
|                   | MP     | 0.5036 | 0.0 | 0.3274          | 0.1851          |
|                   | MPS    | 0.5036 | 0.0 | 0.3274          | 0.1851          |
| Cl <sup>-</sup>   | CC     | 0.5215 | 0.0 | 0.4184          | 0.4184          |
|                   | BPCEAV | 0.0619 | 0.0 | 1.4388          | 0.0769          |
|                   | MP     | 0.2848 | 0.0 | 0.1851          | 0.1047          |
|                   | MPS    | 0.2848 | 0.0 | 0.1851          | 0.1047          |

**Table S2: Distance parameters of Lennard-Jones potentials ( $\sigma$  in Å) used for various interaction pairs in the different force fields.**

| $\sigma$ (Å)    |        | O      | H      | Na <sup>+</sup> | Cl <sup>-</sup> |
|-----------------|--------|--------|--------|-----------------|-----------------|
| O               | CC     | 3.169  | 0.0    | 2.8610          | 3.7341          |
|                 | BPCEAV | 3.1589 | 0.0    | 2.5133          | 4.2686          |
|                 | MP     | 3.1589 | 1.5794 | 2.8279          | 3.8854          |
|                 | MPS    | 3.1589 | 1.5794 | 2.8279          | 3.8854          |
| H               | CC     | 0.0    | 0.0    | 0.0             | 0.0             |
|                 | BPCEAV | 0.0    | 0.0    | 0.0             | 0.0             |
|                 | MP     | 1.5794 | 0.0    | 1.2485          | 2.306           |
|                 | MPS    | 1.5794 | 0.0    | 1.2485          | 2.306           |
| Na <sup>+</sup> | CC     | 2.8610 | 0.0    | 2.5830          | 3.7123          |
|                 | BPCEAV | 2.5133 | 0.0    | 2.2173          | 2.9051          |
|                 | MP     | 2.8279 | 1.2485 | 2.4970          | 3.5545          |
|                 | MPS    | 2.8279 | 1.2485 | 2.4970          | 3.5545          |
| Cl <sup>-</sup> | CC     | 3.7341 | 0.0    | 2.5830          | 4.4000          |
|                 | BPCEAV | 4.2686 | 0.0    | 2.9051          | 4.8496          |
|                 | MP     | 3.8854 | 2.306  | 3.5545          | 4.6120          |
|                 | MPS    | 3.8854 | 2.306  | 3.5545          | 4.6120          |

**Table S3: Charges of hydrogen (H) and oxygen (O) atoms as well as sodium (Na<sup>+</sup>) and chloride (Cl<sup>-</sup>) ions used in the different force field parameters sets. The charges are given in units of elementary charge.**

|        | $q_O$   | $q_H$  | $q_{Na^+}$ | $q_{Cl^-}$ |
|--------|---------|--------|------------|------------|
| CC     | -0.8476 | 0.4238 | 1.0        | -1.0       |
| BPCEAV | -1.1128 | 0.5564 | 0.85       | -0.85      |
| MP     | -1.1128 | 0.5564 | 1.0        | -1.0       |
| MPS    | -1.1128 | 0.5564 | 0.85       | -0.85      |

## 2 Average Dipole Vector Alignment around $\text{Cl}^-$ Ion

For the  $\text{Cl}^-$  ion, the average dipole vector alignment  $P_{\text{Cl}^-}^r(r)$  could also be quantified based on the distance to the closest hydrogen atom

$$\hat{r}_{ij}^{\text{Cl}^- \text{H}} = \min_{i \in \{1,2\}} \frac{\vec{r}_i^{\text{Cl}^-} - \vec{r}_j^{\text{H}_i}}{|\vec{r}_i^{\text{Cl}^-} - \vec{r}_j^{\text{H}_i}|} \quad (1)$$

instead of the distance to the oxygen atom of a surrounding water molecule. This results in

$$P_{\text{Cl}^-}^r(r) = \frac{1}{|\vec{p}_{\text{H}_2\text{O}}|} \frac{1}{N_{\text{Cl}^-} N_{\text{H}_2\text{O}}} \left\langle \sum_{i=1}^{N_{\text{Cl}^-}} \sum_{j=1}^{N_{\text{H}_2\text{O}}} \vec{p}_j \cdot \hat{r}_{ij}^{\text{Cl}^- \text{O}} \delta(|\hat{r}_{ij}^{\text{Cl}^- \text{H}}| - r) \right\rangle \quad (2)$$

instead of eq 12 that is used to obtain the bottom panels of Figures 6 and 7 in Section 3.5 of the main document. Figures S1 and S2 show the results of this substitution. Obviously, the peak positions change because the distances to the water molecules in the solvation shells are now measured differently – which is likewise reflected in the corresponding  $\text{Cl}^-$ -hydrogen radial distribution functions (RDFs). The peak heights on the other hand are hardly affected. Also, as for the case in which we used the  $\text{Cl}^-$ -oxygen in the main text, we observe a plateau regain at small  $r$  in which all force fields give the same polarization. This is again followed by a region in which MP-S shows a smaller polarization than MP and is very much in line with  $P^r; \text{MP rescaled} = 0.85 \cdot P^r; \text{MP}$ . Consequently, the conclusions from the analysis in Section 3.5 remain unchanged.

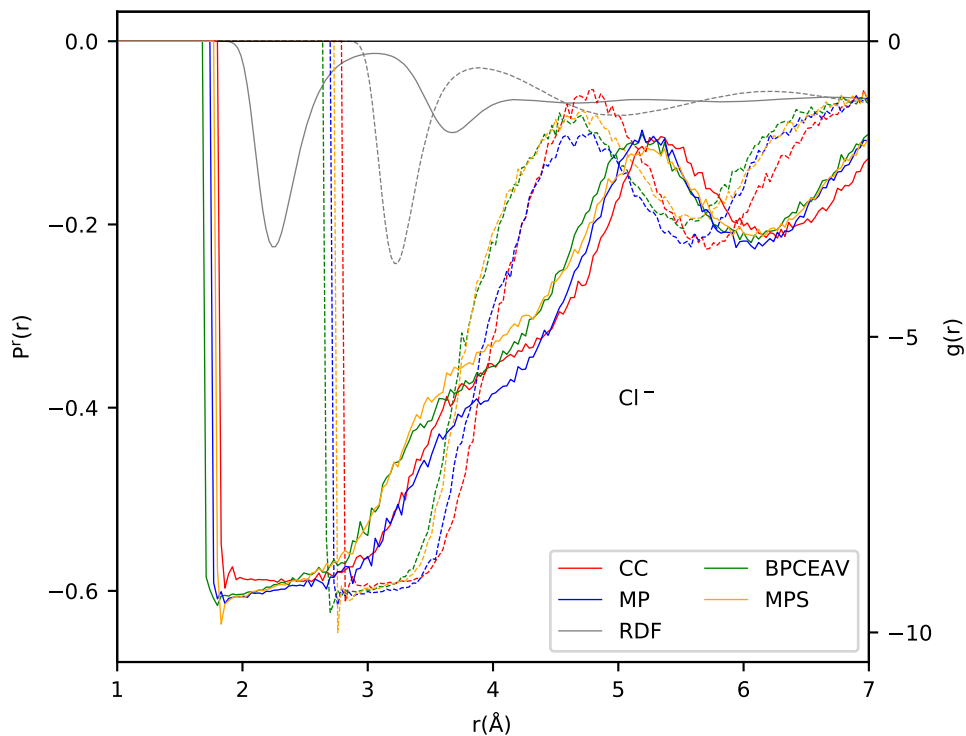

Figure S1: Average alignment of dipole vectors  $P^r(r)$  around  $\text{Cl}^-$  ions. The dashed lines are based on eq 12 in the main document and are thus identical to those of same color shown in the bottom panel of Figure 6. The corresponding solid lines have been obtained from eq 2 above. The  $\text{Cl}^-$ -oxygen ( $\text{Cl}^-$ -hydrogen) radial distribution functions (RDFs) for the CC force field as a representative example are shown as dashed (solid) gray lines. All results are for 0.1 M solutions to avoid ion-ion interactions.

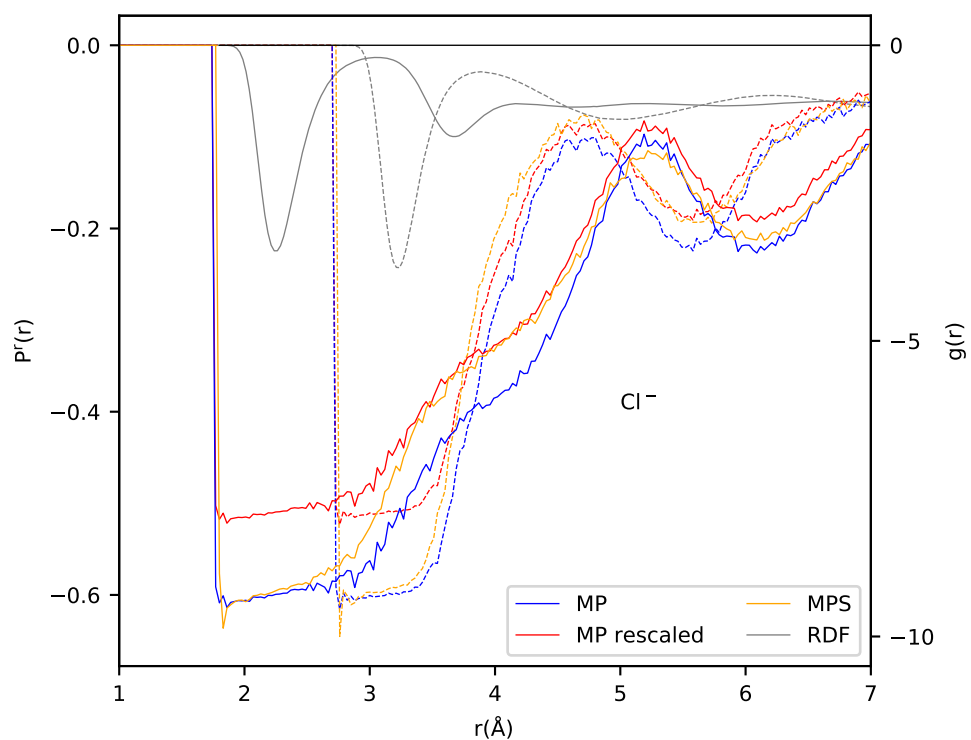

Figure S2: Same as Figure S1 for MP and MP-S, but also  $P^r; \text{MP rescaled} = 0.85 \cdot P^r; \text{MP}$  for comparison – like in the bottom panel of Figure 7 in the main document.
